# Supplementary material for: InSe/Te van der Waals Heterostructure as a High-Efficiency Solar Cell from Computational Screening
Source: MDPI journal article supplement (doi:10.3390/ma14143768), 2021-07-06
Supplement: s1 [file s1]

Electronic Supplementary Material for

# **InSe/Te van der Waals Heterostructure as a High-Efficiency Solar Cell from Computational Screening**

**Zechen Ma <sup>1,†</sup>, Ruifeng Li <sup>1,†</sup>, Rui Xiong<sup>1</sup>, Yinggan Zhang <sup>2</sup>, Chao Xu <sup>3</sup>, Cuilian Wen <sup>1,\*</sup> and Baisheng Sa <sup>1,\*</sup>**

<sup>1</sup> Multiscale Computational Materials Facility, and Key Laboratory of Eco-materials Advanced Technology, College of Materials Science and Engineering, Fuzhou University, Fuzhou 350100, P. R. China

<sup>2</sup> College of Materials, Xiamen University, Xiamen 361005, P. R. China

<sup>3</sup> Xiamen Talentmats New Materials Science & Technology Co., Ltd., Xiamen 361015, P. R. China

\* Correspondence: clwen@fzu.edu.cn (C. Wen); bssa@fzu.edu.cn (B. Sa)

<sup>†</sup> These authors equally contributed to this work.

**Table S1.** The lattice constants  $a$  (Å), the M-M, M- $X_A$  and  $X_B$ - $X_B$  (M = Al, Ga, In,  $X_A$  = S, Se, Te and  $X_B$  = Se, Te) bond lengths  $L_{M-M}$  (Å),  $L_{M-X_A}$  (Å) and  $L_{X_B-X_B}$  (Å), the PBE and HSE band gaps  $E_g^{\text{PBE}}$  (eV),  $E_g^{\text{HSE}}$  (eV) for the  $MX_A$  and  $X_B$  monolayers

| System | $a$   | $L_{M-M}$ | $L_{M-X_A}$ | $L_{X_B-X_B}$ | $E_g^{\text{PBE}}$ | $E_g^{\text{HSE}}$ |
|--------|-------|-----------|-------------|---------------|--------------------|--------------------|
| AlS    | 3.563 | 2.588     | 2.320       |               | 2.19               | 3.16               |
| AlSe   | 3.776 | 2.586     | 2.472       |               | 1.97               | 2.97               |
| AlTe   | 4.116 | 2.573     | 2.700       |               | 1.88               | 2.71               |
| GaS    | 3.612 | 2.466     | 2.362       |               | 2.41               | 3.46               |
| GaSe   | 3.787 | 2.462     | 2.492       |               | 1.85               | 2.82               |
| GaTe   | 4.096 | 2.459     | 2.696       |               | 1.48               | 2.22               |
| InS    | 3.893 | 2.800     | 2.556       |               | 1.76               | 2.66               |
| InSe   | 4.041 | 2.797     | 2.677       |               | 1.51               | 2.32               |
| InTe   | 4.327 | 2.790     | 2.875       |               | 1.43               | 2.16               |
| Se     | 3.714 |           |             | 2.668         | 0.61               | 1.14               |
| Te     | 4.185 |           |             | 3.036         | 0.59               | 1.09               |

**Table S2.** The energy differences  $\Delta E$  (meV) and interlayer distances  $d$  (Å) as well as the lattice constants  $a$  (Å) and bond lengths  $L$  (Å) of various configurations for  $\text{AlX}_A/\text{X}_B$  vdW heterostructures

| System  | Configuration | $\Delta E$ | $d$   | $a$   | $L_{\text{M-M}}$ | $L_{\text{M-X}_A}$ | $L_{\text{X}_A\text{-X}_B}$ |
|---------|---------------|------------|-------|-------|------------------|--------------------|-----------------------------|
| AlS-Se  | a             | 3          | 3.159 | 3.627 | 2.587            | 2.339              | 2.649                       |
|         | b             | 5          | 3.138 | 3.629 | 2.587            | 2.340              | 2.652                       |
|         | c             | 61         | 3.608 | 3.625 | 2.588            | 2.339              | 2.648                       |
|         | d             | 0          | 3.123 | 3.627 | 2.588            | 2.340              | 2.651                       |
|         | e             | 62         | 3.617 | 3.624 | 2.587            | 2.337              | 2.647                       |
|         | f             | 6          | 3.160 | 3.629 | 2.586            | 2.340              | 2.652                       |
| AlS-Te  | a             | 1          | 3.273 | 3.821 | 2.578            | 2.401              | 2.984                       |
|         | b             | 14         | 3.264 | 3.826 | 2.580            | 2.404              | 2.984                       |
|         | c             | 66         | 3.728 | 3.817 | 2.577            | 2.399              | 2.982                       |
|         | d             | 0          | 3.617 | 3.822 | 2.579            | 2.402              | 2.985                       |
|         | e             | 69         | 3.389 | 3.817 | 2.578            | 2.399              | 2.982                       |
|         | f             | 12         | 3.273 | 3.826 | 2.580            | 2.403              | 2.984                       |
| AlSe-Se | a             | 4          | 3.156 | 3.741 | 2.579            | 2.462              | 2.674                       |
|         | b             | 2          | 3.070 | 3.744 | 2.580            | 2.462              | 2.678                       |
|         | c             | 72         | 3.652 | 3.736 | 2.580            | 2.460              | 2.672                       |
|         | d             | 0          | 3.089 | 3.744 | 2.580            | 2.462              | 2.678                       |
|         | e             | 73         | 3.663 | 3.737 | 2.580            | 2.460              | 2.671                       |
|         | f             | 4          | 3.124 | 3.744 | 2.579            | 2.462              | 2.678                       |
| AlSe-Te | a             | 3          | 3.272 | 3.934 | 2.576            | 2.522              | 2.997                       |
|         | b             | 11         | 3.184 | 3.939 | 2.574            | 2.522              | 2.999                       |
|         | c             | 75         | 3.815 | 3.932 | 2.574            | 2.520              | 3.000                       |
|         | d             | 0          | 3.180 | 3.935 | 2.573            | 2.522              | 2.999                       |
|         | e             | 78         | 3.822 | 3.930 | 2.575            | 2.520              | 2.996                       |
|         | f             | 11         | 3.271 | 3.938 | 2.573            | 2.522              | 2.995                       |
| AlTe-Se | a             | 21         | 3.075 | 3.953 | 2.567            | 2.656              | 2.721                       |
|         | b             | 0          | 2.908 | 3.965 | 2.568            | 2.659              | 2.736                       |
|         | c             | 122        | 3.763 | 3.943 | 2.567            | 2.654              | 2.730                       |
|         | d             | 16         | 3.042 | 3.956 | 2.566            | 2.655              | 2.732                       |
|         | e             | 122        | 3.754 | 3.943 | 2.567            | 2.653              | 2.720                       |
|         | f             | 10         | 3.033 | 3.956 | 2.568            | 2.657              | 2.718                       |
| AlTe-Te | a             | 7          | 3.307 | 4.126 | 2.566            | 2.705              | 3.027                       |
|         | b             | 7          | 3.220 | 4.136 | 2.566            | 2.707              | 3.033                       |
|         | c             | 100        | 3.951 | 4.121 | 2.565            | 2.702              | 3.030                       |
|         | d             | 0          | 3.212 | 4.129 | 2.566            | 2.704              | 3.031                       |
|         | e             | 101        | 3.965 | 4.119 | 2.566            | 2.701              | 3.023                       |
|         | f             | 12         | 3.285 | 4.131 | 2.565            | 2.706              | 3.023                       |

**Table S3.** The energy differences  $\Delta E$  (meV) and interlayer distances  $d$  (Å) as well as the lattice constants  $a$  (Å) and bond lengths  $L$  (Å) of various configurations for  $\text{GaX}_A/\text{X}_B$  vdW heterostructures

| System  | Configuration | $\Delta E$ | $d$   | $a$   | $L_{\text{M-M}}$ | $L_{\text{M-X}_A}$ | $L_{\text{X}_A\text{-X}_B}$ |
|---------|---------------|------------|-------|-------|------------------|--------------------|-----------------------------|
| GaS-Se  | a             | 6          | 3.104 | 3.656 | 2.466            | 2.375              | 2.656                       |
|         | b             | 5          | 3.037 | 3.660 | 2.467            | 2.376              | 2.653                       |
|         | c             | 71         | 3.585 | 3.654 | 2.468            | 2.374              | 2.654                       |
|         | d             | 0          | 3.020 | 3.660 | 2.468            | 2.377              | 2.657                       |
|         | e             | 72         | 3.598 | 3.654 | 2.468            | 2.375              | 2.659                       |
|         | f             | 8          | 3.092 | 3.659 | 2.467            | 2.376              | 2.657                       |
| GaS-Te  | a             | 7          | 3.153 | 3.861 | 2.477            | 2.442              | 2.987                       |
|         | b             | 14         | 3.081 | 3.866 | 2.477            | 2.443              | 2.987                       |
|         | c             | 78         | 3.647 | 3.855 | 2.478            | 2.438              | 2.991                       |
|         | d             | 0          | 3.062 | 3.863 | 2.476            | 2.443              | 2.991                       |
|         | e             | 80         | 3.671 | 3.856 | 2.476            | 2.439              | 2.994                       |
|         | f             | 18         | 3.158 | 3.865 | 2.476            | 2.442              | 2.989                       |
| GaSe-Se | a             | 5          | 3.068 | 3.765 | 2.464            | 2.487              | 2.683                       |
|         | b             | 0.1        | 2.969 | 3.770 | 2.465            | 2.488              | 2.677                       |
|         | c             | 81         | 3.658 | 3.757 | 2.463            | 2.484              | 2.676                       |
|         | d             | 0          | 3.020 | 3.764 | 2.463            | 2.487              | 2.679                       |
|         | e             | 82         | 3.647 | 3.758 | 2.462            | 2.485              | 2.683                       |
|         | f             | 5          | 3.059 | 3.765 | 2.463            | 2.488              | 2.677                       |
| GaSe-Te | a             | 8          | 3.169 | 3.959 | 2.474            | 2.548              | 3.001                       |
|         | b             | 11         | 3.081 | 3.967 | 2.472            | 2.549              | 3.003                       |
|         | c             | 92         | 3.747 | 3.954 | 2.470            | 2.544              | 3.003                       |
|         | d             | 0          | 3.083 | 3.963 | 2.472            | 2.548              | 3.004                       |
|         | e             | 93         | 3.732 | 3.954 | 2.471            | 2.544              | 2.999                       |
|         | f             | 18         | 3.160 | 3.965 | 2.473            | 2.548              | 3.003                       |
| GaTe-Se | a             | 27         | 3.004 | 3.965 | 2.457            | 2.663              | 2.735                       |
|         | b             | 0          | 2.833 | 3.980 | 2.456            | 2.665              | 2.723                       |
|         | c             | 140        | 3.722 | 3.950 | 2.452            | 2.660              | 2.722                       |
|         | d             | 22         | 2.963 | 3.970 | 2.455            | 2.662              | 2.726                       |
|         | e             | 140        | 3.733 | 3.955 | 2.455            | 2.659              | 2.735                       |
|         | f             | 13         | 2.911 | 3.969 | 2.456            | 2.665              | 2.736                       |
| GaTe-Te | a             | 8          | 3.208 | 4.134 | 2.464            | 2.713              | 3.027                       |
|         | b             | 4          | 3.113 | 4.149 | 2.464            | 2.714              | 3.037                       |
|         | c             | 113        | 3.915 | 4.129 | 2.461            | 2.707              | 3.031                       |
|         | d             | 0          | 3.126 | 4.141 | 2.464            | 2.712              | 3.036                       |
|         | e             | 113        | 3.954 | 4.130 | 2.462            | 2.708              | 3.024                       |
|         | f             | 15         | 3.209 | 4.141 | 2.463            | 2.713              | 3.033                       |

**Table S4.** The energy differences  $\Delta E$  (meV) and interlayer distances  $d$  (Å) as well as the lattice constants  $a$  (Å) and bond lengths  $L$  (Å) of various configurations for  $\text{InX}_A/\text{X}_B$  vdW heterostructures

| System  | Configuration | $\Delta E$ | $d$   | $a$   | $L_{\text{M-M}}$ | $L_{\text{M-X}_A}$ | $L_{\text{X}_A\text{-X}_B}$ |
|---------|---------------|------------|-------|-------|------------------|--------------------|-----------------------------|
| InS-Se  | a             | 8          | 2.963 | 3.823 | 2.799            | 2.543              | 2.695                       |
|         | b             | 0          | 2.862 | 3.829 | 2.798            | 2.544              | 2.692                       |
|         | c             | 89         | 3.562 | 3.814 | 2.798            | 2.541              | 2.691                       |
|         | d             | 1          | 2.876 | 3.825 | 2.799            | 2.544              | 2.694                       |
|         | e             | 90         | 3.562 | 3.816 | 2.800            | 2.541              | 2.697                       |
|         | f             | 6          | 2.947 | 3.824 | 2.798            | 2.543              | 2.696                       |
| InS-Te  | a             | 10         | 3.054 | 4.023 | 2.811            | 2.593              | 3.010                       |
|         | b             | 5          | 2.961 | 4.029 | 2.810            | 2.595              | 3.011                       |
|         | c             | 95         | 3.632 | 4.018 | 2.811            | 2.591              | 3.013                       |
|         | d             | 0          | 2.964 | 4.024 | 2.811            | 2.593              | 3.012                       |
|         | e             | 97         | 3.643 | 4.018 | 2.811            | 2.591              | 3.013                       |
|         | f             | 14         | 3.005 | 4.029 | 2.813            | 2.594              | 3.012                       |
| InSe-Se | a             | 14         | 2.918 | 3.913 | 2.793            | 2.653              | 2.720                       |
|         | b             | 0          | 2.776 | 3.921 | 2.795            | 2.655              | 2.713                       |
|         | c             | 108        | 3.581 | 3.903 | 2.791            | 2.649              | 2.712                       |
|         | d             | 8          | 2.840 | 3.915 | 2.793            | 2.652              | 2.715                       |
|         | e             | 108        | 3.567 | 3.903 | 2.793            | 2.650              | 2.719                       |
|         | f             | 8          | 2.864 | 3.914 | 2.794            | 2.653              | 2.719                       |
| InSe-Te | a             | 10         | 3.041 | 4.108 | 2.806            | 2.699              | 3.025                       |
|         | b             | 3          | 2.931 | 4.117 | 2.805            | 2.700              | 3.027                       |
|         | c             | 105        | 3.690 | 4.102 | 2.804            | 2.696              | 3.023                       |
|         | d             | 0          | 2.980 | 4.112 | 2.804            | 2.700              | 3.027                       |
|         | e             | 106        | 3.730 | 4.103 | 2.800            | 2.696              | 3.022                       |
|         | f             | 13         | 3.036 | 4.112 | 2.804            | 2.700              | 3.024                       |
| InTe-Se | a             | 55         | 2.844 | 4.095 | 2.780            | 2.833              | 2.770                       |
|         | b             | 0          | 2.521 | 4.124 | 2.782            | 2.842              | 2.754                       |
|         | c             | 187        | 3.683 | 4.075 | 2.778            | 2.827              | 2.763                       |
|         | d             | 49         | 2.768 | 4.105 | 2.780            | 2.832              | 2.758                       |
|         | e             | 187        | 3.672 | 4.077 | 2.779            | 2.828              | 2.764                       |
|         | f             | 23         | 2.662 | 4.106 | 2.782            | 2.843              | 2.773                       |
| InTe-Te | a             | 14         | 3.103 | 4.272 | 2.790            | 2.869              | 3.059                       |
|         | b             | 0          | 2.932 | 4.290 | 2.792            | 2.872              | 3.064                       |
|         | c             | 133        | 3.891 | 4.264 | 2.787            | 2.863              | 3.057                       |
|         | d             | 6          | 3.027 | 4.281 | 2.789            | 2.869              | 3.062                       |
|         | e             | 133        | 3.893 | 4.266 | 2.790            | 2.864              | 3.050                       |
|         | f             | 12         | 3.061 | 4.278 | 2.790            | 2.871              | 3.059                       |

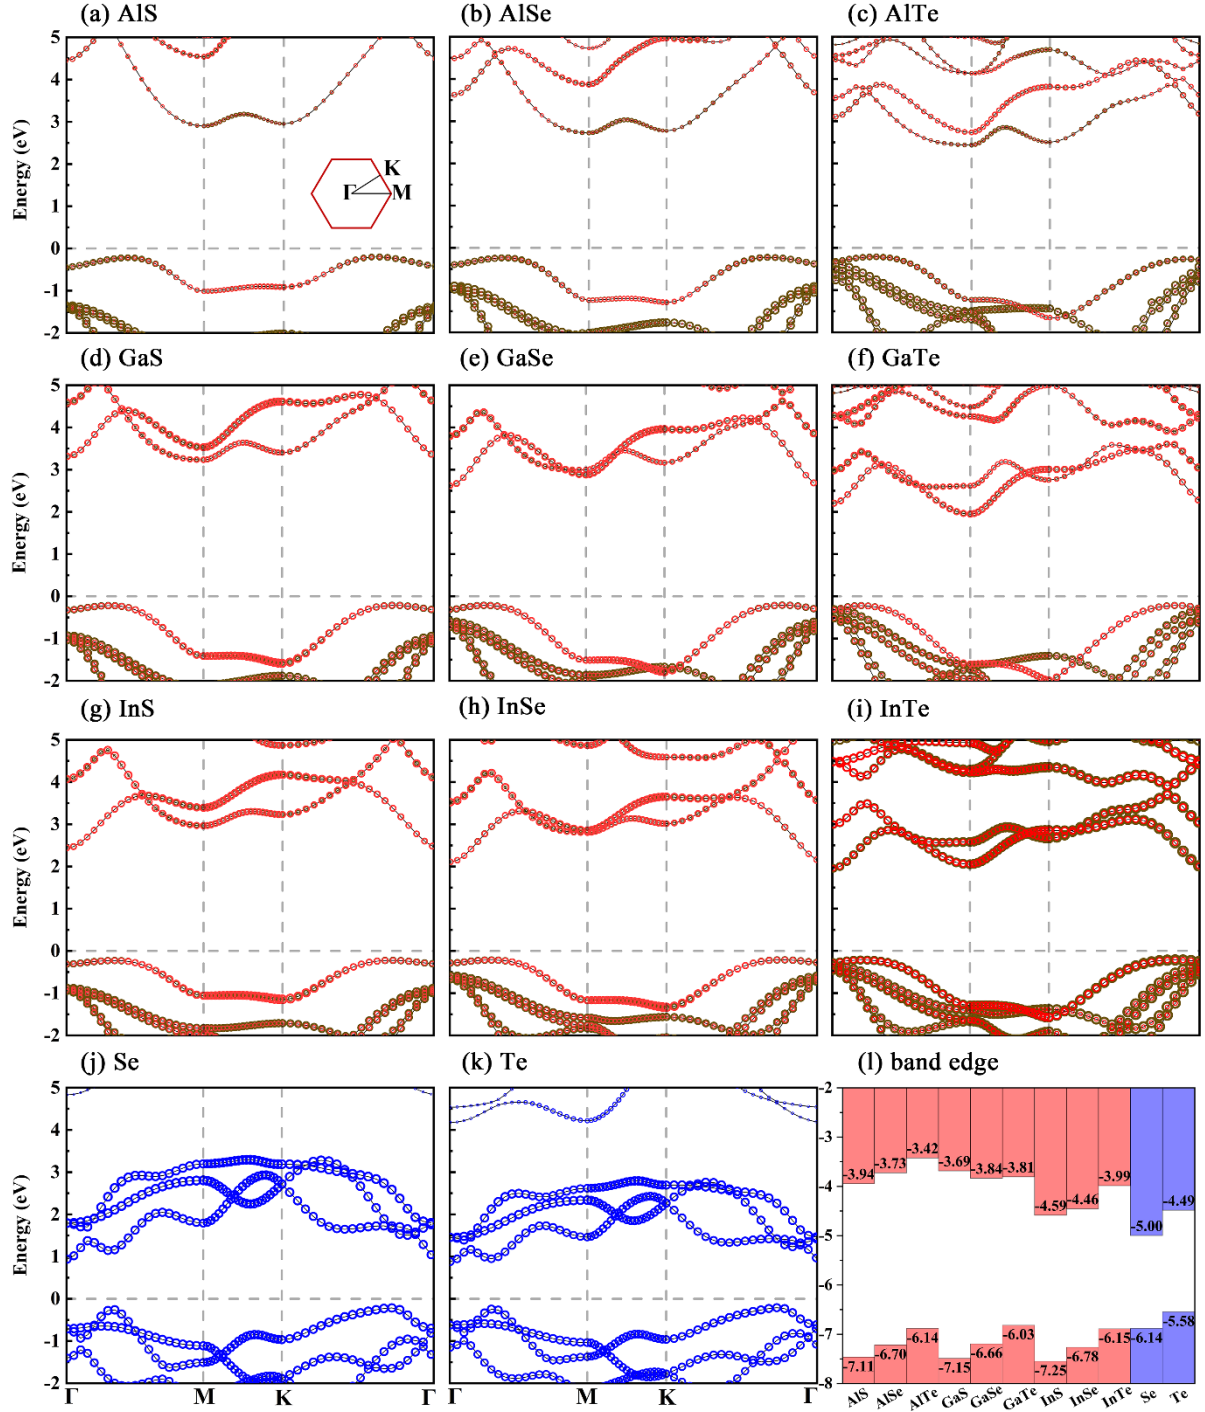

**Figure S1.** Projected band structures of (a) AlS, (b) AlSe, (c) AlTe, (d) GaS, (e) GaSe, (f) GaTe, (g) InS, (h) InSe, (i) InTe, (j) Se and (k) Te monolayers by HSE06 hybrid functional method. The red, brown, blue circles represent the projected specific gravity of M,  $\chi_A$ ,  $\chi_B$  atoms, respectively. The first Brillouin zone with high-symmetry points are shown in the inset of (a). (l) The band edge alignments of these monolayers.
